# Supplementary material for: Sun exposure and challenges of sun protection in adolescents and young adults: A prevalence observational study
Source: PubMed Central journal article supplement (PMC11485268; doi:10.3892/mi.2024.195), 2024-10-07
Supplement: Supplementary_Data.pdf [file Supplementary_Data.pdf]

**Data S1. Questionnaire of the study.**

**YOUNG PEOPLE AND THE SUN**

**1. Your age:**

- Less than 15
- 15 – 19
- 20 – 25
- More than 25

**2. Gender?**

- Male
- Female
- Other

**3. Education:**

- School (high school/middle school)
- Apprentice
- University-student
- No superior studies

**4. Sun exposure:**

- Very frequently
- Frequently
- Sometimes
- Rarely
- Very rarely

**5. I expose myself to the sun**

(multiple answers possible)

- During recreational activities (sport, swimming)
- Because I want to tan
- Because it is good for my health (vitamin D)
- As little as possible

**6. Sun protection: I protect myself**

(multiple answers possible)

- I limit exposure
- I search for shade
- I use covering garments
- Use a hat
- Use sunscreen
- I don't protect myself against the sun

**7. I don't use sunscreen because**

(multiple answers possible)

- I want to tan
- I don't like the texture, color...
- I'm scared of the ingredients
- I want to protect the environment
- No, indeed, I use sunscreen

**8. Sunburn: When was the last?**

- I never have sunburn
- Several years ago
- Within the last year
- This summer, I burn all the time

**9. Have you seen the stopskincancer clip?**

- Yes
- No

**10. Is there sufficient information about the dangers of the sun**

- Yes, we are very well informed
- There is information but not a lot
- No, there is not enough information, we need more
- I don't want more information
